# Supplementary material for: Vicinal Co atom-coordinated Fe–N–C catalysts to boost the oxygen reduction reaction
Source: Royal Society of Chemistry journal article supplement (doi:10.1039/d2ta00884j), 2022-01-01
Supplement: d2ta00884j1.pdf [file d2ta00884j1.pdf]

## Vicinal Co Atoms Coordinated Fe-N-C Catalysts to Boost the Oxygen Reduction Reaction

Yubin Chen<sup>a,b</sup>, Jiejie Li<sup>c</sup>, Yanping Zhu<sup>a,b</sup>, Jian Zou<sup>a,b</sup>, Hao Zhao<sup>a,b</sup>, Chi Chen<sup>\*a</sup>,  
Qingqing Cheng<sup>a</sup>, Bo Yang<sup>c</sup>, Liangliang Zou<sup>a</sup>, Zhiqing Zou<sup>a</sup>, Hui Yang<sup>\*a</sup>

a. Shanghai Advanced Research Institute, Chinese Academy of Sciences, Shanghai 201210, China;

b. University of Chinese Academy of Sciences, Beijing 100049, China

c. School of Physical Science and Technology, ShanghaiTech University, Shanghai, 201210, China.

\* Corresponding author, E-mail: [chenchi@sari.ac.cn](mailto:chenchi@sari.ac.cn); [chengqq@sari.ac.cn](mailto:chengqq@sari.ac.cn) and [yangh@sari.ac.cn](mailto:yangh@sari.ac.cn)

### Experimental Section

#### Synthesis of FeCo-ZIF8-X

Typically, 3.284 g 2-methylimidazole was dissolved in 500 mL methanol with stirring. Then 500 mL methanol containing 2.975 g  $\text{Zn}(\text{NO}_3)_2 \cdot 6\text{H}_2\text{O}$ , 244 mg  $\text{Fe}(\text{NO}_3)_3 \cdot 9\text{H}_2\text{O}$  and a certain amount of  $\text{Co}(\text{NO}_3)_2 \cdot 6\text{H}_2\text{O}$  were added with vigorous stirring for 24h at room temperature. The obtained product was separated by centrifugation and washed with ethanol and finally dried at 60°C under vacuum for overnight.

#### Synthesis of Fe-ZIF8

Typically, 3.284 g 2-methylimidazole was dissolved in 500 mL methanol with stirring. Then 500 mL methanol containing 2.975 g  $\text{Zn}(\text{NO}_3)_2 \cdot 6\text{H}_2\text{O}$ , and 244 mg  $\text{Fe}(\text{NO}_3)_3 \cdot 9\text{H}_2\text{O}$  were added with vigorous stirring for 24h at room temperature. The obtained product was separated by centrifugation and washed with ethanol and finally dried at 60°C under vacuum for overnight.

#### Synthesis of Co-ZIF8

Typically, 3.284 g 2-methylimidazole was dissolved in 500 mL methanol with stirring. Then 500 mL methanol containing 2.975 g  $\text{Zn}(\text{NO}_3)_2 \cdot 6\text{H}_2\text{O}$ , and 660 mg  $\text{Co}(\text{NO}_3)_2 \cdot 6\text{H}_2\text{O}$  were added with vigorous stirring for 24h at room temperature. The

obtained product was separated by centrifugation and washed with ethanol and finally dried at 60°C under vacuum for overnight.

### **Synthesis of FeCo-NC-X**

The powder of FeCo-Zn-ZIF-X was placed in a tube furnace and then heated to the 600 °C for 1 h, and then to the 900 °C (5 °C·min<sup>-1</sup>) for 1 h under flowing Ar atmosphere and finally naturally cooled to room temperature, respectively. The X (X = 1, 2, 3) represents the amount of Co(NO<sub>3</sub>)<sub>2</sub>·6H<sub>2</sub>O (220, 440 and 660 mg) used in the synthesis process.

### **Synthesis of Fe-NC**

The powder of Fe-Zn-ZIF was placed in a tube furnace and then heated to the 600 °C for 1 h, and then to the 900 °C (5 °C·min<sup>-1</sup>) for 1 h under flowing Ar atmosphere and finally naturally cooled to room temperature, respectively.

### **Synthesis of Co-NC**

The powder of Co-Zn-ZIF was placed in a tube furnace and then heated to the 600 °C for 1 h, and then to the 900 °C (5 °C·min<sup>-1</sup>) for 1 h under flowing Ar atmosphere and finally naturally cooled to room temperature, respectively.

### **Physical Characterizations**

The morphology and crystal of materials were characterized by scanning electron microscopy (SEM, Hitachi S4800), transmission electron microscopy (TEM, FEI Tecnai 30F, 200 kV), high angle annular dark field scanning transmission electron microscopy (HAADF-STEM, FEI Titan Themis G2 60-300) and X-ray diffraction (XRD, Bruker AXS D8 ADVANCE). The content and chemical states of elements were determined by inductively coupled plasma optical emission spectroscopy (ICP-OES, Varian 710-ES) and X-ray photoelectron spectroscopy (XPS, Thermo Fisher Escalab 250 Xi). The surface areas and porosities were determined by measuring the N<sub>2</sub> adsorption-desorption isotherms on Micromeritics ASAP-2020 instrument. The Mössbauer measurements were performed at room temperature (or xx K) using a conventional spectrometer (Germany, Wissel MS-500) in transmission geometry with constant acceleration mode. A <sup>57</sup>Co(Rh) source with activity of 25 mCi was used. The velocity calibration was done with a room temperature α-Fe absorber. The spectra were

fitted by the software Recoil using Lorentzian Multiplet Analysis.

### Electrochemical Measurements

All electrochemical curves were measured on a CHI 730e electrochemical workstation (CH Instruments) using three-electrode system equipped with a modulated speed rotator (Pine Instruments). To prepare a homogeneous ink containing the catalyst, 6 mg of the catalyst was dispersed in 1 mL of solution containing 950  $\mu\text{L}$  of ethanol and 50  $\mu\text{L}$  of 5% Nafion solution under sonication. While, commercial 20 wt.% Pt/C sample was prepared by dispersing 1 mg of the catalyst in 1 mL of 0.05% Nafion solution. The absolute mass of the catalyst loading was 0.6  $\text{mg cm}^{-2}$  for M-N-C and 0.02  $\text{mg}_{\text{Pt}} \text{cm}^{-2}$  for Pt/C. The glassy carbon rotating disk electrode (RDE, diameter is 5 mm, area is 0.196  $\text{cm}^2$ ) or rotating ring disk electrode (RRDE, diameter is 5.61 mm, area is 0.2475  $\text{cm}^2$ ) coated with as-prepared catalyst, graphite rod and Hg/Hg<sub>2</sub>SO<sub>4</sub> were served as working electrode, counter electrode and reference electrode. All potentials are provided vs RHE.

All the linear sweep voltammetry (LSV) tests with the potential range from 0.1 to 1.1 V vs. RHE were conducted in 0.1 M HClO<sub>4</sub> electrolyte with a rotation speed of 900 rpm at a scan rate of 10  $\text{mV s}^{-1}$ . RRDE measurements were conducted by LSV at 900 rpm with a scan rate of 10  $\text{mV s}^{-1}$ , while the ring electrode was held at 1.2 V vs. RHE. The number of electron transfer ( $n$ ) and the percent of H<sub>2</sub>O<sub>2</sub> were calculated by the following equations:

$$\text{H}_2\text{O}_2\% = 200 \times \frac{\frac{I_r}{N}}{I_d + \frac{I_r}{N}}$$

$$n = 4 \times \frac{I_d}{I_d + \frac{I_r}{N}}$$

Where  $I_d$  is the disk current and  $I_r$  is the ring current,  $N=0.37$  (calibrated) is the current collection efficiency of the Pt ring. The ring potential is fixed at 1.3 V vs. RHE.

The Koutecky-Levich (K-L) plots were recorded by RDE measurement at various

rotating speeds from 400 to 2500 rpm. The K-L equation is displayed as followed:

$$\frac{1}{j} = \frac{1}{j_L} + \frac{1}{j_K} = \frac{1}{B\omega^{1/2}} + \frac{1}{j_K}$$

$$B=0.62nFC_0D^{2/3}V^{-1/6}$$

Where  $J$  is the measured current density,  $J_K$  and  $J_L$  are the kinetic and limiting current densities,  $\omega$  is the angular velocity of the disk,  $n$  is the electron transfer number,  $F$  is the Faraday constant ( $96485 \text{ C mol}^{-1}$ ),  $C_0$  is the bulk concentration of  $O_2$  ( $1.2 \times 10^{-6} \text{ mol cm}^{-3}$ ),  $D_0$  is the diffusion coefficient of  $O_2$  in electrolytes ( $1.9 \times 10^{-5} \text{ cm}^2 \text{ s}^{-1}$ ), and  $V$  is the kinematic viscosity of the  $0.1 \text{ M HClO}_4$  ( $0.0089 \text{ cm}^2 \text{ s}^{-1}$ ).

Accelerated durability test (ADT) was conducted by cycling the catalyst with the potentials range from  $0.6$  to  $1.1 \text{ V}$  at a scan rate of  $50 \text{ mV s}^{-1}$  under continuous purging  $O_2$  in electrolyte.

#### **Proton exchange membrane fuel cell (PEMFC) tests.**

For the PEMFCs, Gore ( $15 \text{ um}$ ) was selected as the proton exchange membrane. The MEAs with a  $2.5 \times 2.5 \text{ cm}^2$  active area were fabricated by catalyst coated membrane (CCM) method. The catalyst inks were prepared by dispersing  $40\%$  Pt/C (anode) and FeCo-NC (cathode) with  $25 \text{ wt.}\%$  Nafion in isopropanol/ $H_2O$  solution under ultrasonic for  $3 \text{ h}$ . The anode consisted of Pt/C with a metal loading of  $0.1 \text{ mg cm}^{-2}$ . The cathode consisted of FeCo-NC catalysts with the loading of  $3 \text{ mg cm}^{-2}$ . The performance of PEMFCs were measured by polarization test on Arbin Fuel Cell Testing System (Arbin Instrument Inc., USA) and the polarization data was recorded per  $2 \text{ min}$ . The as-prepared MEAs were activated and tested in a PEMFC testing setup by purging  $H_2$  into the anode with the flow rate of  $1 \text{ standard liter per minute (slpm)}$  and  $O_2$  into the cathode with flow rate of  $1 \text{ slpm}$ . The testing temperature was controlled at  $80 \text{ }^\circ\text{C}$  with  $100 \text{ RH}\%$  and the back-pressure was fixed at  $30 \text{ PSIG}$ .

#### **Computational Details**

All the spin polarized density functional theory (DFT) calculations were performed within the Vienna Ab-initio Simulation Package (VASP) code.<sup>1, 2</sup> The projected augmented wave (PAW) method was used to model the electron-ion interactions.<sup>3, 4</sup> Generalized gradient approximation (GGA) of BEEF-vdW functional<sup>5</sup> was chosen to

calculate the exchange and correlation energies with explicit long-range dispersion force considered.<sup>6-8</sup> The single  $\text{FeN}_4$  and  $\text{FeCoN}_6$  model were constructed based on a  $5 \times 5$  slab of graphene (001), as shown in Fig. S16. All the atoms were relaxed during structural optimization. The vacuum height was higher than 15 Å to prevent the interaction between periodic structures. A  $2 \times 2 \times 1$  k-point grid generated with the Monkhorst-Pack scheme was used.<sup>2</sup> The energy cutoff was set as 500 eV and the convergence criteria was 0.05 eV/Å. A correction with +0.09 eV was used for gas-phase  $\text{H}_2$  energies.<sup>9</sup> The free energy of  $\text{O}_2$  was obtained with  $\text{H}_2\text{O}$  and  $\text{H}_2$  as reference, owing to the poor description of DFT for high-spin ground state of  $\text{O}_2$ .<sup>10</sup> Solvation stabilization effect was explicitly considered by -0.5 eV for the energy of  $\text{OH}^*$ , -0.35 for  $\text{OOH}^*$ .<sup>1</sup> The computational hydrogen electrode (CHE) model was used for ORR free energy profile calculation.<sup>10</sup> Heat capacities and entropies at 298.15K were referred from previous work.<sup>11</sup>

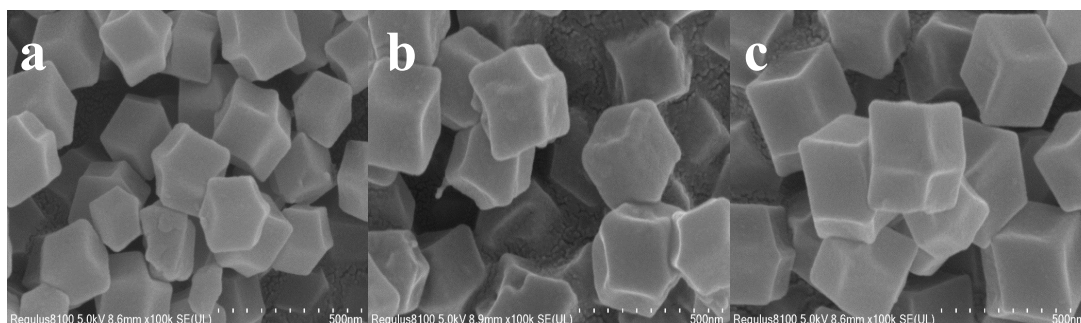

**Figure. S1** The SEM images of (a) Fe-ZIF8, (b) FeCo-ZIF8-1 and (c) FeCo-ZIF8-2

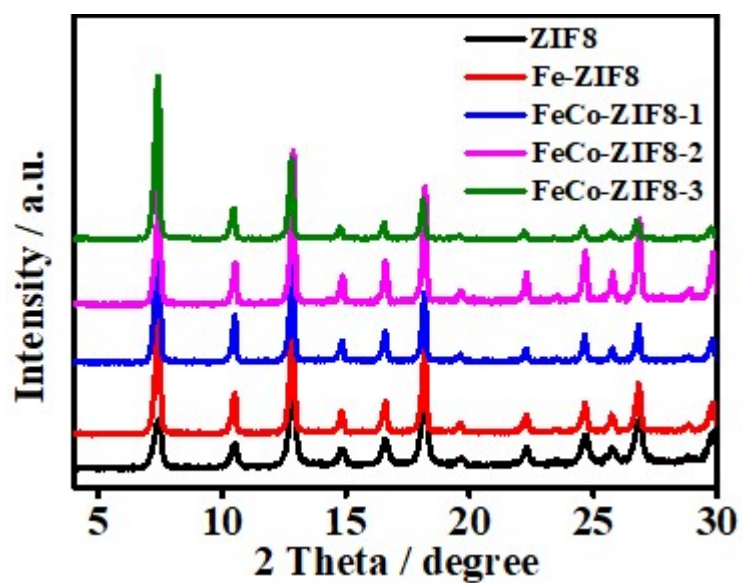

**Figure. S2** The XRD patterns of ZIF8, Fe-ZIF8 and FeCo-ZIF8-X

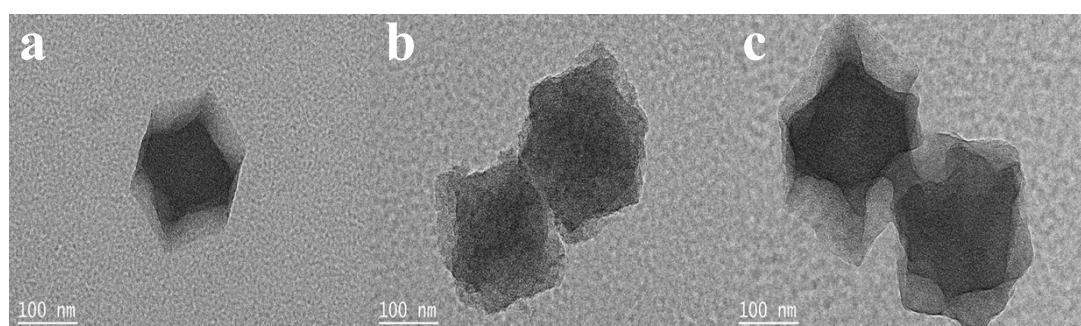

**Figure. S3** The TEM images of (a) Fe-NC, (b) FeCo-NC-1 and (c) FeCo-NC-2

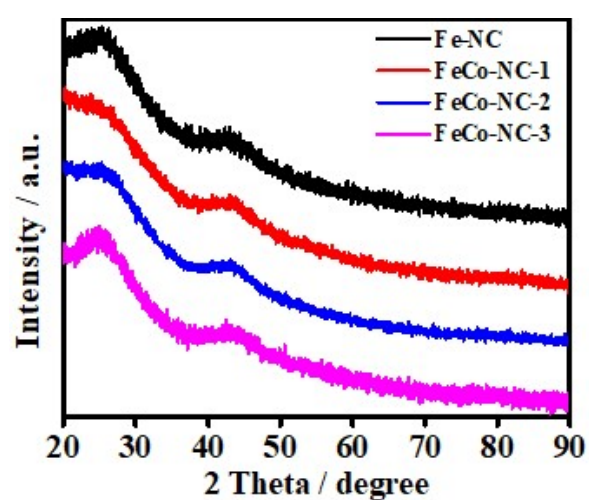

**Figure. S4** The XRD patterns of Fe-NC and FeCo-NC-X

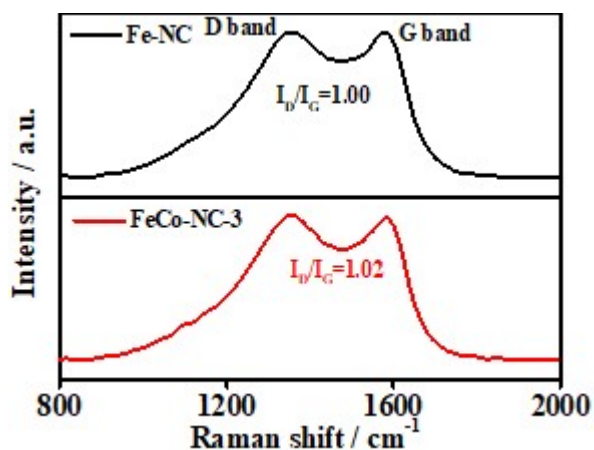

**Figure. S5** Raman spectra of Fe-NC and FeCo-NC-3. The intensity ratio of the D band ( $\sim 1345$   $\text{cm}^{-1}$ ) to G band ( $\sim 1580$   $\text{cm}^{-1}$ ) ( $I_D/I_G$ ) for Fe-NC and FeCo-NC-3 in Raman spectra.

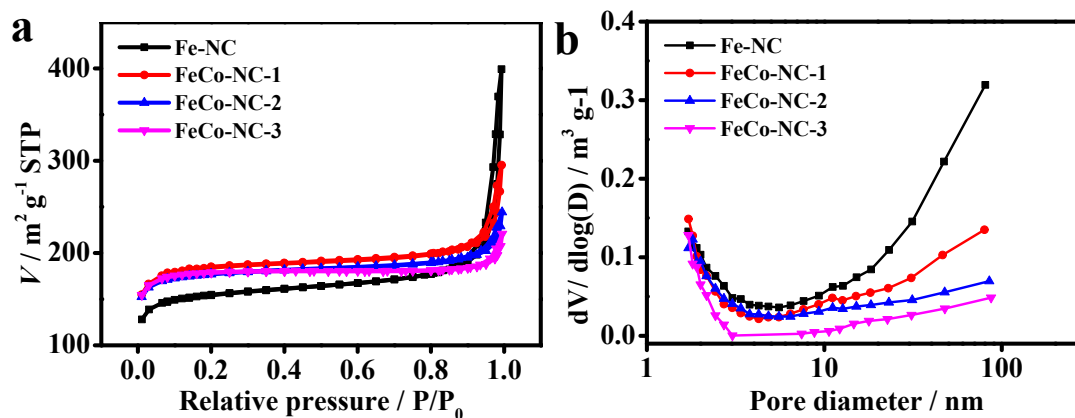

**Figure. S6** The  $\text{N}_2$  adsorption-desorption isotherms and inset pore size distributions for Fe-NC and FeCo-NC-X

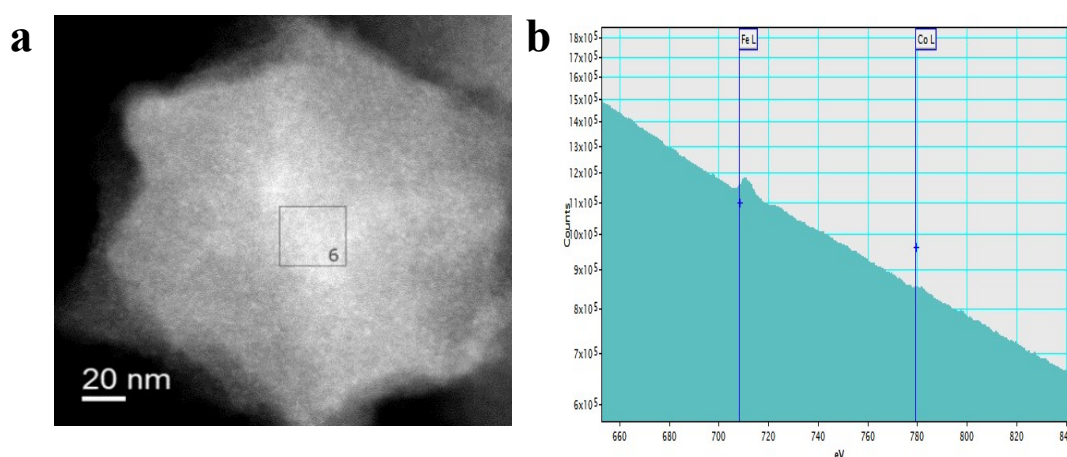

**Figure. S7** (a) the selection small area ( $30$   $\text{nm} \times 30$   $\text{nm}$ ) in FeCo-NC-3 and (b) the corresponding EELS spectrum.

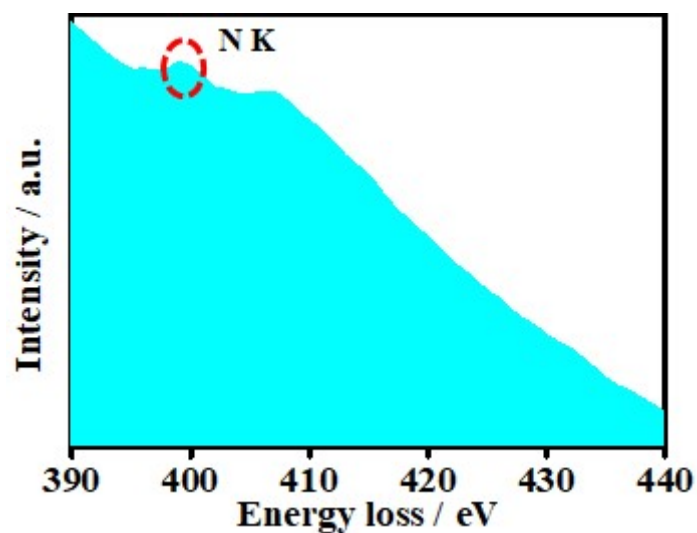

Figure. S8 EELS spectrum of N element for FeCo-NC-3.

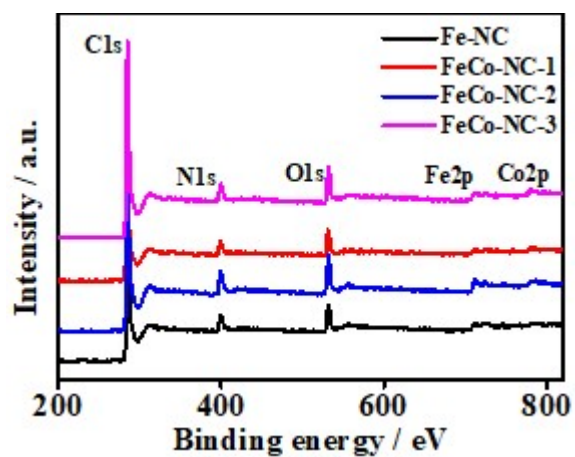

Figure. S9 The XPS survey spectra of Fe-NC and FeCo-NC-X

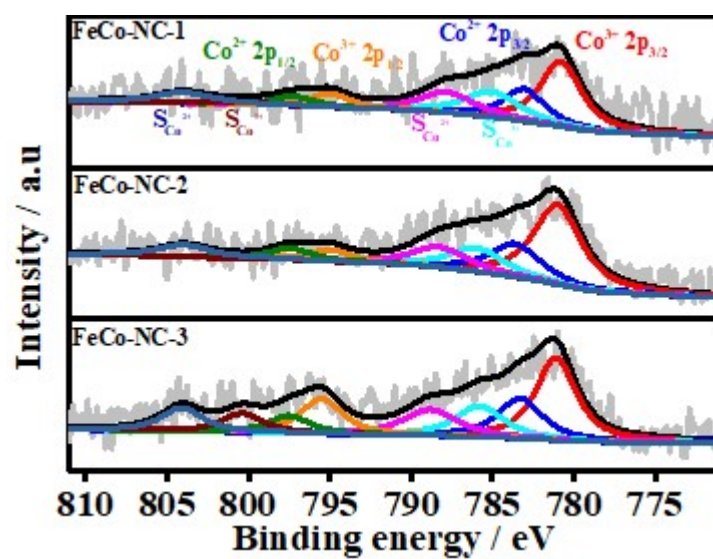

Figure. S10 The high-resolution Co<sub>2p</sub> XPS spectra of FeCo-NC-X catalysts



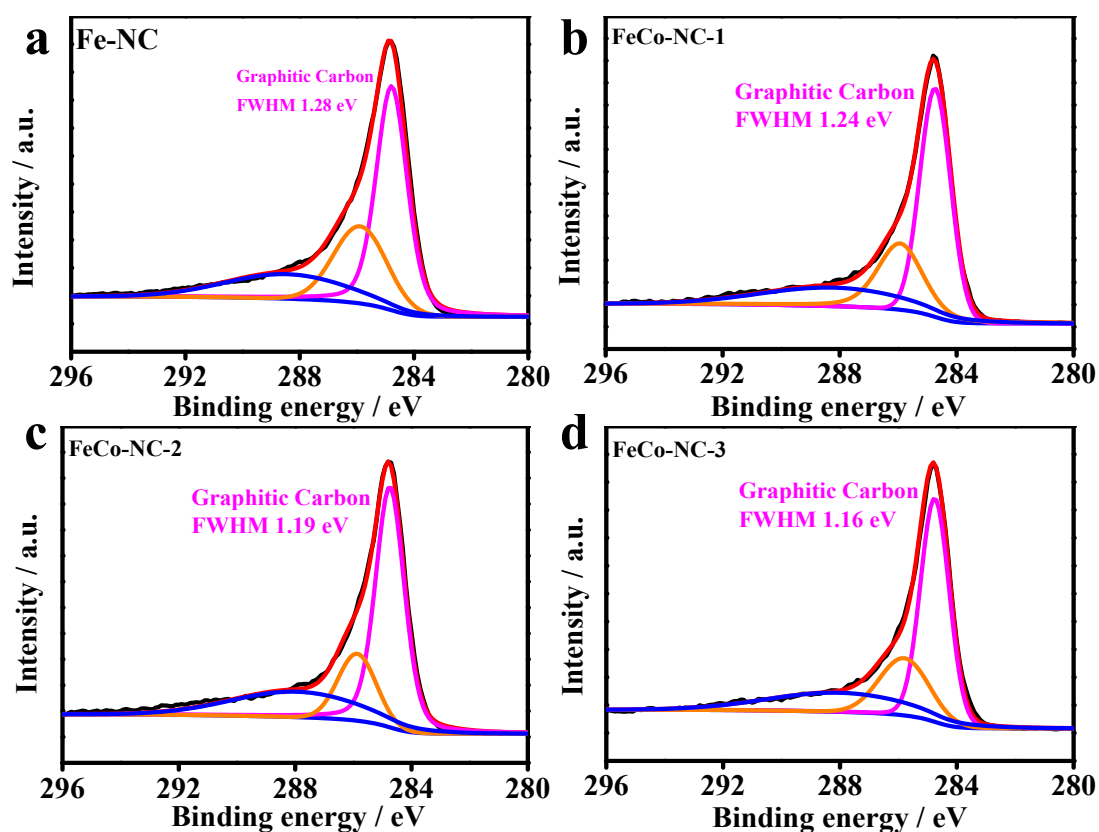

**Figure. S11** The high-resolution C1s XPS spectra of various catalysts

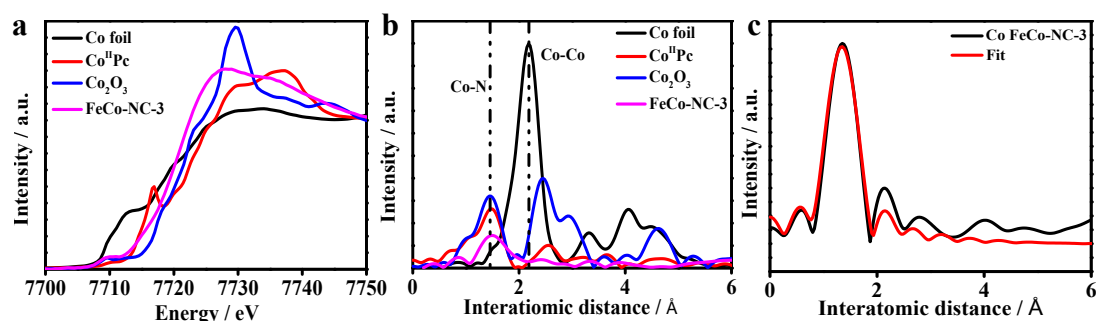

**Figure. S12** (a) Co XANES spectra and (b) Co EXAFS spectra of Fe-NC, FeCo-NC-X, CoO, Co<sub>2</sub>O<sub>3</sub>, Co foil and CoPc; (c) corresponding Co K-edge EXAFS fitting.

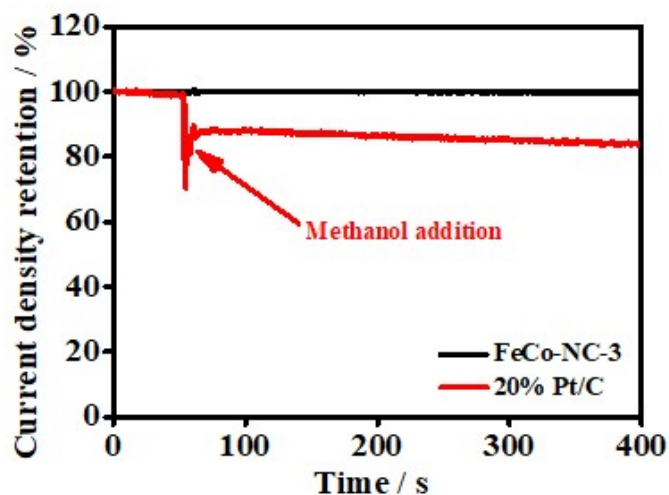

**Figure. S13** Current density retention curves of FeCo-NC-3 and 20% Pt/C at 0.5 V in 0.1 M HClO<sub>4</sub> with addition of methanol.

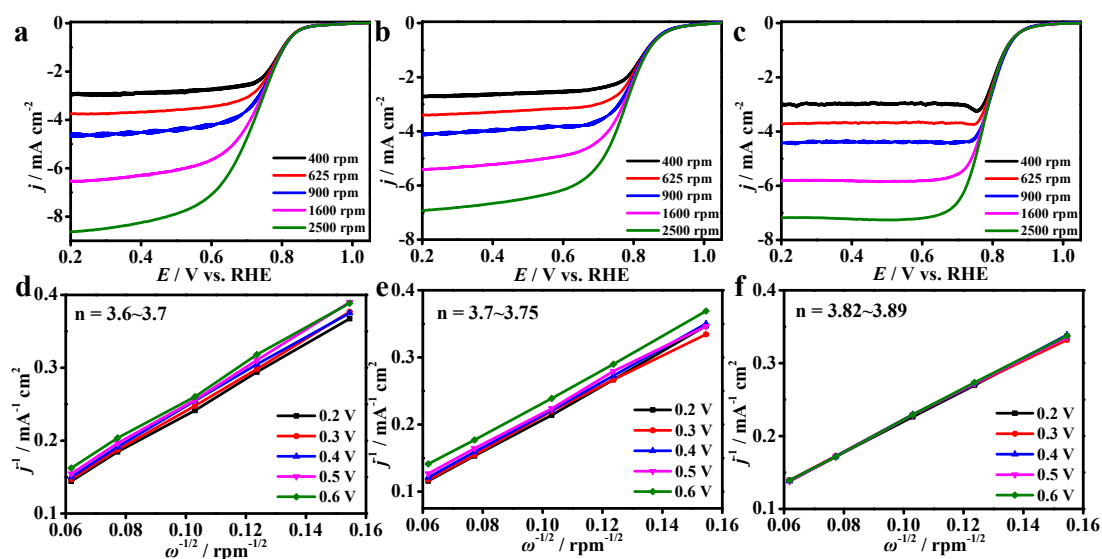

**Figure. S14** LSV curves and K-L plots of (a, d) Fe-NC, (b, e) FeCo-NC-1 and (c, f) FeCo-NC-2 in O<sub>2</sub>-saturated 0.1 M HClO<sub>4</sub> solution.

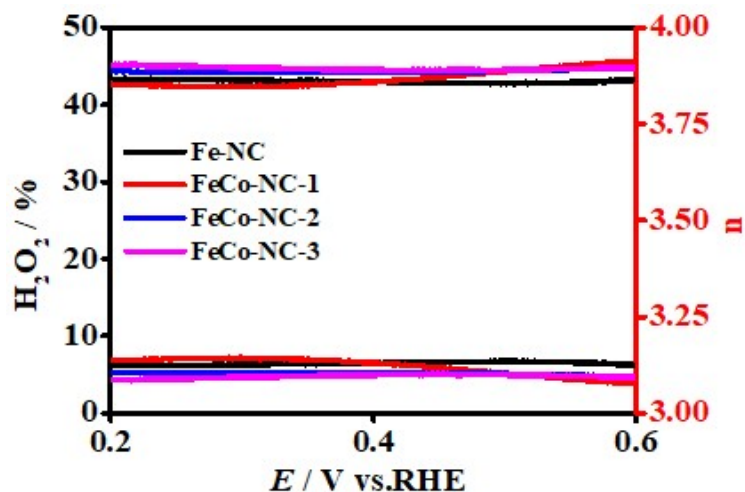

**Figure. S15**  $\text{H}_2\text{O}_2$  yield and electron transfer number for Fe-NC, FeCo-NC-1, FeCo-NC-2, and FeCo-NC-3 in 0.1 M  $\text{HClO}_4$ .

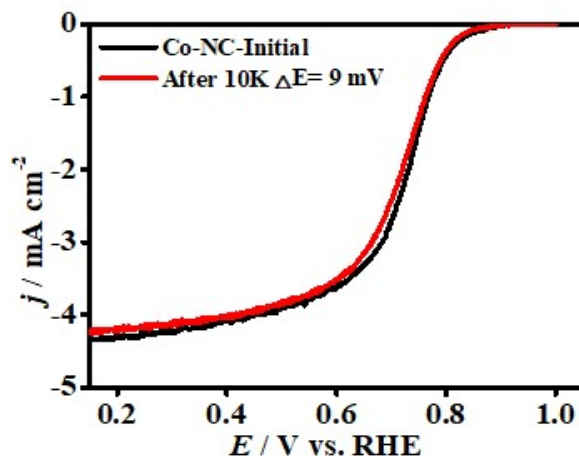

**Figure. S16** ORR polarization curves before and after the stability test for Co-NC in 0.1 M  $\text{HClO}_4$ .

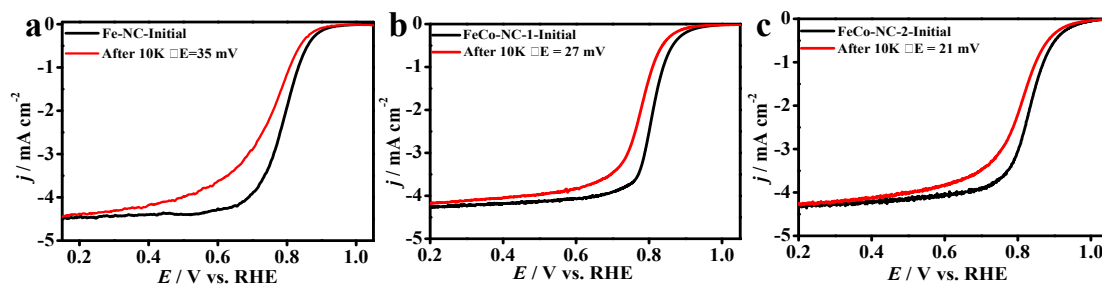

**Figure. S17** ORR polarization curves before and after the stability test for (a) Fe-NC, (b) FeCo-NC-1 and (c) FeCo-NC-2 in 0.1 M  $\text{HClO}_4$ .

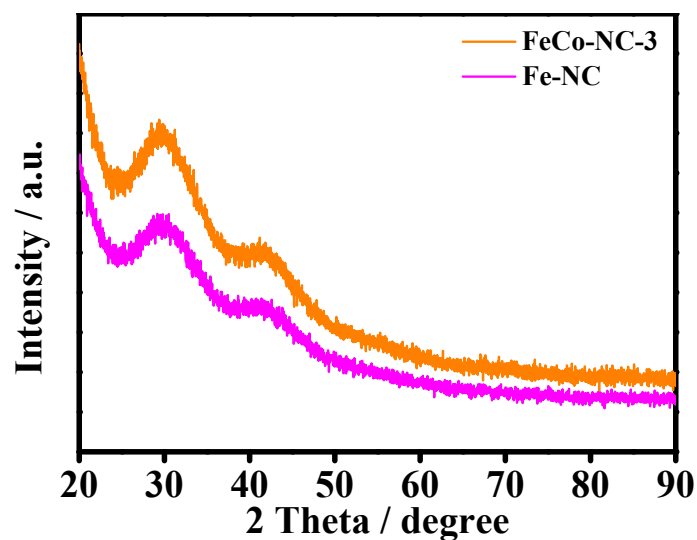

**Figure. S18** The XRD patterns of Fe-NC and FeCo-NC-3 after 10000-cycle ADT.

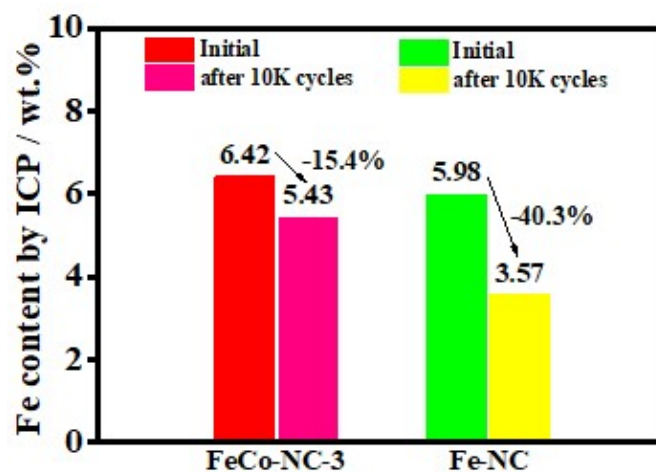

**Figure. S19** Fe content by ICP measurements before and after 10k cycles.

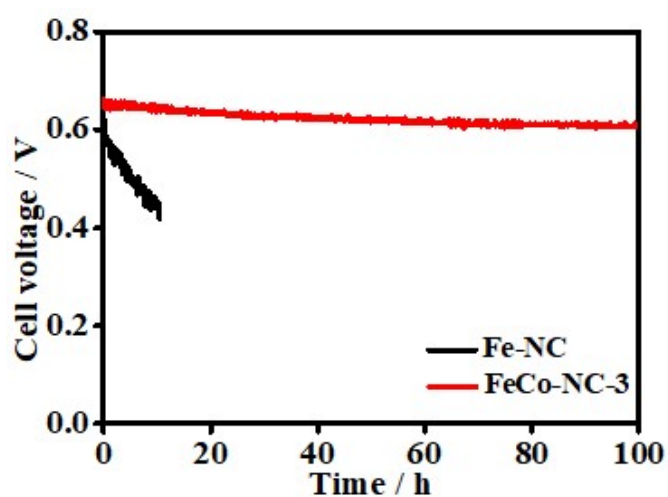

**Figure. S20** Stability test at a constant current density of  $0.4 \text{ A cm}^{-2}$  of FeCo-NC-3 and Fe-NC in PEMFC. (Backpressure: 2 bar; Cell temperature:  $80^\circ\text{C}$ ;  $\text{H}_2/\text{O}_2$  flow rate:  $400 \text{ mL min}^{-1}$ )

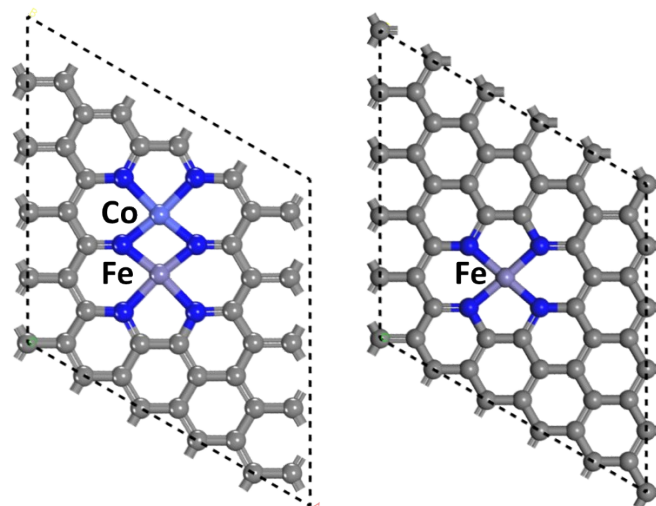

**Figure. S21** Top view of the FeCoN<sub>6</sub>(left) and Fe-N<sub>4</sub>(right) slab.

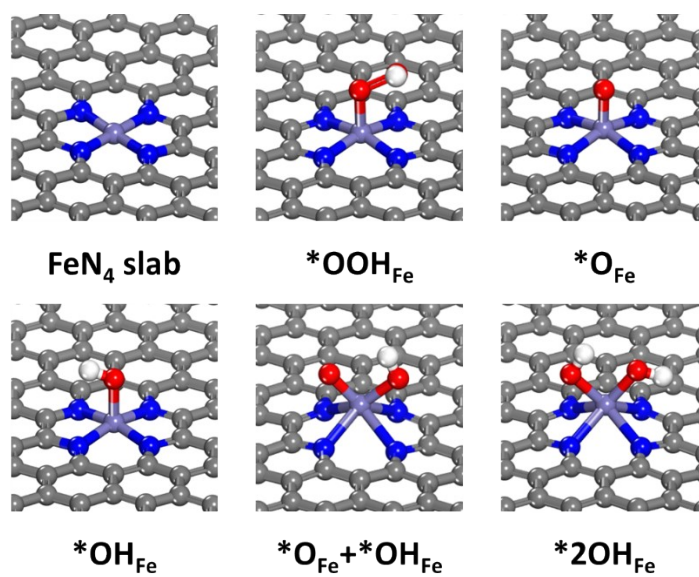

**Figure. S22** Intermediate structures over Fe-N<sub>4</sub> slab.

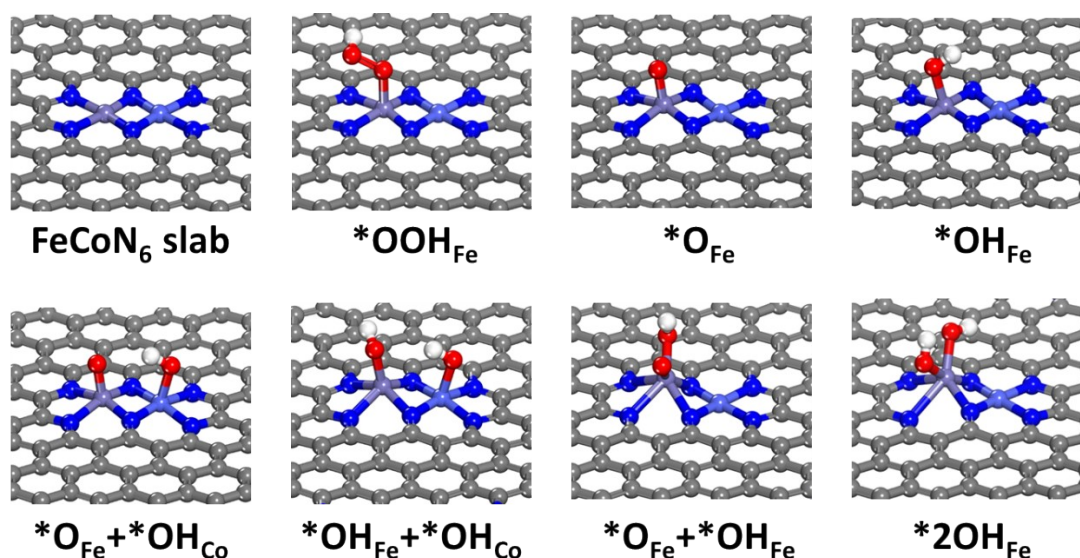

**Figure. S23** Intermediate structures over FeCoN<sub>6</sub> slab.

**Table S1** BET surface area and pore volume of several Fe-NC and FeCo-NC-X samples.

|           | BET surface area / m <sup>2</sup> g <sup>-1</sup> | Micropore area / m <sup>2</sup> g <sup>-1</sup> | Pore volume / cm <sup>3</sup> g <sup>-1</sup> |
|-----------|---------------------------------------------------|-------------------------------------------------|-----------------------------------------------|
| Fe-NC     | 585                                               | 464.6                                           | 0.68                                          |
| FeCo-NC-1 | 558.9                                             | 452.1                                           | 0.66                                          |
| FeCo-NC-2 | 536                                               | 442.4                                           | 0.58                                          |
| FeCo-NC-3 | 536.7                                             | 466                                             | 0.64                                          |

**Table S2** The elemental content of N, Fe and Co derived from the XPS survey and ICP-OES for all samples.

|           | N (at. %) <sup>a</sup> | Fe (at. %) <sup>a</sup> | Co (at. %) <sup>a</sup> | Fe (wt. %) <sup>b</sup> | Co (wt. %) <sup>b</sup> |
|-----------|------------------------|-------------------------|-------------------------|-------------------------|-------------------------|
| Fe-NC     | 7.64                   | 1.57                    | /                       | 5.98                    | /                       |
| FeCo-NC-1 | 7.37                   | 1.36                    | 0.59                    | 6.01                    | 1.37                    |
| FeCo-NC-2 | 7.59                   | 1.4                     | 0.69                    | 6.35                    | 1.71                    |
| FeCo-NC-3 | 7.17                   | 1.38                    | 0.88                    | 6.42                    | 1.98                    |

**Table S3** Summary of the Mossbauer parameters and assignments to different Iron species in Fe-NC and FeCo-NC-3 catalysts.

|           | Fe species | IS / mm s <sup>-1</sup> | QS / mm s <sup>-1</sup> | Content / % |
|-----------|------------|-------------------------|-------------------------|-------------|
| Fe-NC     | D1         | 0.18                    | 2.03                    | 9.7         |
|           | D2         | 0.251                   | 1.277                   | 40.9        |
|           | D3         | 0.172                   | 0.639                   | 49.4        |
| FeCo-NC-3 | D1         | 0.13                    | 2                       | 12.1        |
|           | D2         | 0.248                   | 1.21                    | 25.9        |
|           | D3         | 0.119                   | 0.639                   | 62          |

**Table S4** EXAFS fitting results of Fe-NC and FeCo-NC-3 catalysts.

|           | Path | C.N.    | R (Å)     | $\sigma^2 \times 10^3$ (Å <sup>2</sup> ) | $\Delta E$ (eV) | R factor |
|-----------|------|---------|-----------|------------------------------------------|-----------------|----------|
| Fe-NC     | Fe-N | 5.4±1.8 | 1.98±0.01 | 11.9±2.4                                 | -2.6±2.0        | 0.010    |
| FeCo-NC-3 | Fe-N | 3.7±1.6 | 2.00±0.02 | 10.8±2.7                                 | 0.0±2.1         | 0.014    |
|           | Co-N | 3.9±1.9 | 1.92±0.02 | 8.8±4.9                                  | -4.2±4.0        | 0.015    |

**Table S5** ORR activity and durability comparison of Fe-based catalysts in acidic media.

| Catalysts                  | Electrolyte (mol L <sup>-1</sup> ) | $E_{1/2}$ / V (vs . RHE) | Activity decay / mV      | ref              |
|----------------------------|------------------------------------|--------------------------|--------------------------|------------------|
| <b>FeCo-NC-3</b>           | <b>0.1 HClO<sub>4</sub></b>        | <b>0.842</b>             | <b>11 @ 10000 cycles</b> | <b>This work</b> |
| Fe-NC                      | 0.1 HClO <sub>4</sub>              | 0.803                    | 35 @ 10000 cycles        | This work        |
| C-Fe-Z8-Ar                 | 0.1 HClO <sub>4</sub>              | 0.82                     | 40 @ 10000 cycles        | 12               |
| Fe-N/CNT-2                 | 0.1 HClO <sub>4</sub>              | 0.76                     | 20 @ 500 cycles          | 13               |
| 0.17CVD/Fe-N-C- <i>kat</i> | 0.5 H <sub>2</sub> SO <sub>4</sub> | 0.835                    | 20 @ 10000 cycles        | 14               |
| Fe(Zn)-N-C                 | 0.1 HClO <sub>4</sub>              | 0.83                     | 14 @ 10000 cycles        | 15               |
| Fe,Mn/N-C                  | 0.1 HClO <sub>4</sub>              | 0.804                    | 18 @ 8000 cycles         | 16               |
| FeCoN <sub>x</sub> /C      | 0.1 HClO <sub>4</sub>              | 0.86                     | 13 @ 5000 cycles         | 17               |
| FeCo-SAs-N-C               | 0.1 HClO <sub>4</sub>              | 0.832                    | 32 @ 10000 cycles        | 18               |
| M/FeCo-SAs-N-C             | 0.1 HClO <sub>4</sub>              | 0.851                    | 17@ 10000 cycles         | 18               |
| FeNi-N <sub>6</sub> -C     | 0.1 HClO <sub>4</sub>              | 0.80                     | 12 @ 5000 cycles         | 19               |

**Table S6** Comparisons of recently reported H<sub>2</sub>-O<sub>2</sub> PEMFCs performance on SACs/DACs.

| Catalyst                       | T <sub>cell</sub><br>[°C] | H <sub>2</sub> /O <sub>2</sub> flow rate<br>[mL min <sup>-1</sup> ] | Back<br>pressure | Catalyst loading<br>[mg cm <sup>-2</sup> ] | P <sub>max</sub><br>[mW cm <sup>-2</sup> ] | Ref              |
|--------------------------------|---------------------------|---------------------------------------------------------------------|------------------|--------------------------------------------|--------------------------------------------|------------------|
| <b>FeCo-NC-3</b>               | <b>80</b>                 | <b>1000/1000</b>                                                    | <b>2 bar</b>     | <b>3.0</b>                                 | <b>800</b>                                 | <b>This work</b> |
| HP-FeN <sub>4</sub>            | 80                        | 400/400                                                             | 200 kpa          | 4.0                                        | 700                                        | 20               |
| CPANI-Fe-NaCl                  | 80                        | 150/200                                                             | —                | 4.0                                        | 600                                        | 21               |
| PFeTTPP-1000                   | 80                        | 300/300                                                             | 1.5 bar          | 4.1                                        | 730                                        | 22               |
| Fe <sub>2</sub> -Z8-C          | 80                        | 300/400                                                             | 2.5 bar          | 2.8                                        | 1141                                       | 23               |
| Fe <sub>2</sub> N <sub>6</sub> | 80                        | 400/400                                                             | 200 kpa          | 4.0                                        | 845                                        | 24               |
| (Fe,Co)/N-C                    | 80                        | —                                                                   | 0.2 Mpa          | 0.77                                       | 980                                        | 25               |
| Fe/Ni-N <sub>x</sub> /OC       | 80                        | 200/200                                                             | 1.0 bar          | 4.0                                        | 580                                        | 26               |
| SA-Fe/NG                       | 80                        | 300/400                                                             | 2.5 bar          | 4.0                                        | 870                                        | 27               |
| Mn-N-C-HCl-800/1100            | 80                        | 200/1000                                                            | 1.0 bar          | 4.0                                        | 600                                        | 28               |
| 20 Mn-NC-second                | 80                        | 200/200                                                             | 1.0 bar          | 4.0                                        | 460                                        | 29               |

## Reference

1. G. Kresse and J. Furthmuller, *Comput. Mater. Sci.*, 1996, **6**, 15-50.
2. G. Kresse and J. Furthmuller, *Phys. Rev. B* 1996, **54**, 11169-11186.
3. P. E. Blochl, *Phys. Rev. B*, 1994, **50**, 17953-17979.
4. G. Kresse and D. Joubert, *Phys. Rev. B* 1999, **59**, 1758-1775.
5. J. Wellendorff, K. T. Lundgaard, A. Mogelhoff, V. Petzold, D. D. Landis, J. K. Nørskov, T. Bligaard and K. W. Jacobsen, *Phys. Rev. B*, 2012, **85**, 235149.
6. Z. W. Ulissi, A. J. Medford, T. Bligaard and J. K. Nørskov, *Nat. Commun.*, 2017, **8**, 14621.
7. B. Wang, S. Chen, J. Zhang, S. Li and B. Yang, *J. Phys. Chem. C* 2019, **123**, 30389-30397.
8. T. Gu, B. Wang, S. Chen and B. Yang, *ACS Catal.*, 2020, **10**, 6346-6355.
9. R. Christensen, H. A. Hansen and T. Vegge, *Catal. Sci. Technol.*, 2015, **5**, 4946-4949.
10. J. K. Nørskov, J. Rossmeisl, A. Logadottir, L. Lindqvist, J. R. Kitchin, T. Bligaard and H. Jonsson, *J. Phys. Chem. B*, 2004, **108**, 17886-17892.
11. V. J. Bukas, H. W. Kim, R. Sengpiel, K. Knudsen, J. Voss, B. D. McCloskey and A. C. Luntz, *ACS Catal.*, 2018, **8**, 11940-11951.
12. X. Wang, H. Zhang, H. Lin, S. Gupta, C. Wang, Z. Tao, H. Fu, T. Wang, J. Zheng, G. Wu and X. Li, *Nano Energy*, 2016, **25**, 110-119.
13. D. Xia, X. Yang, L. Xie, Y. Wei, W. Jiang, M. Dou, X. Li, J. Li, L. Gan and F. Kang, *Adv. Funct. Mater.*, 2019, **29**, 1906174.
14. S. Liu, M. Wang, X. Yang, Q. Shi, Z. Qiao, M. Lucero, Q. Ma, K. L. More, D. A. Cullen, Z. Feng and G. Wu, *Angew. Chem., Int. Ed.*, 2020, **59**, 21698-21705.
15. L. Gong, H. Zhang, Y. Wang, E. Luo, K. Li, L. Gao, Y. Wang, Z. Wu, Z. Jin, J. Ge, Z. Jiang, C. Liu and W. Xing, *Angew. Chem. Int. Ed.*, 2020, **59**, 13923-13928.
16. G. Yang, J. Zhu, P. Yuan, Y. Hu, G. Qu, B. A. Lu, X. Xue, H. Yin, W. Cheng, J. Cheng, W. Xu, J. Li, J. Hu, S. Mu and J. N. Zhang, *Nat. Commun.*, 2021, **12**,



1734.

17. M. Xiao, Y. Chen, J. Zhu, H. Zhang, X. Zhao, L. Gao, X. Wang, J. Zhao, J. Ge, Z. Jiang, S. Chen, C. Liu and W. Xing, *J. Am. Chem. Soc.*, 2019, **141**, 17763-17770.
18. S. H. Yin, J. Yang, Y. Han, G. Li, L. Y. Wan, Y. H. Chen, C. Chen, X. M. Qu, Y. X. Jiang and S. G. Sun, *Angew. Chem. Int. Ed.*, 2020, **59**, 21976-21979.
19. Y. Zhou, W. Yang, W. Utetiwabo, Y. M. Lian, X. Yin, L. Zhou, P. Yu, R. Chen and S. Sun, *J. Phys. Chem. Lett.*, 2020, **11**, 1404-1410.
20. N. Zhang, T. Zhou, M. Chen, H. Feng, R. Yuan, C. a. Zhong, W. Yan, Y. Tian, X. Wu, W. Chu, C. Wu and Y. Xie, *Energy Environ. Sci.*, 2020, **13**, 111-118.
21. W. Ding, L. Li, K. Xiong, Y. Wang, W. Li, Y. Nie, S. Chen, X. Qi and Z. Wei, *J. Am. Chem. Soc.*, 2015, **137**, 5414-5420.
22. S. Yuan, J.-L. Shui, L. Grabstanowicz, C. Chen, S. Commet, B. Reprogue, T. Xu, L. Yu and D.-J. Liu, *Angew. Chem., Int. Ed.*, 2013, **52**, 8349-8353.
23. Q. Liu, X. Liu, L. Zheng and J. Shui, *Angew. Chem. Int. Ed.*, 2018, **57**, 1204-1208.
24. N. Zhang, T. Zhou, J. Ge, Y. Lin, Z. Du, C. a. Zhong, W. Wang, Q. Jiao, R. Yuan, Y. Tian, W. Chu, C. Wu and Y. Xie, *Matter*, 2020, **3**, 509-521.
25. J. Wang, Z. Huang, W. Liu, C. Chang, H. Tang, Z. Li, W. Chen, C. Jia, T. Yao, S. Wei, Y. Wu and Y. Li, *J. Am. Chem. Soc.*, 2017, **139**, 17281-17284.
26. Z. Zhu, H. Yin, Y. Wang, C. H. Chuang, L. Xing, M. Dong, Y. R. Lu, G. Casillas-Garcia, Y. Zheng, S. Chen, Y. Dou, P. Liu, Q. Cheng and H. Zhao, *Adv. Mater.*, 2020, **32**, 2004670.
27. L. Yang, D. Cheng, H. Xu, X. Zeng, X. Wan, J. Shui, Z. Xiang and D. Cao, *Proc. Natl. Acad. Sci. U.S.A.*, 2018, **115**, 6626-6631.
28. M. Chen, X. Li, F. Yang, B. Li, T. Stracensky, S. Karakalos, S. Mukerjee, Q. Jia, D. Su, G. Wang, G. Wu and H. Xu, *ACS Catal.*, 2020, **10**, 10523-10534.
29. J. Li, M. Chen, D. A. Cullen, S. Hwang, M. Wang, B. Li, K. Liu, S. Karakalos, M. Lucero, H. Zhang, C. Lei, H. Xu, G. E. Sterbinsky, Z. Feng, D. Su, K. L. More, G. Wang, Z. Wang and G. Wu, *Nat. Catal.*, 2018, **1**, 935-945.
